# Supplementary material for: High capacitive amorphous barium nickel phosphate nanofibers for electrochemical energy storage
Source: Royal Society of Chemistry journal article supplement (doi:10.1039/c6ra08149e), 2016-01-01
Supplement: c6ra08149e1.pdf [file c6ra08149e1.pdf]

Supporting Information

## High Capacitive Amorphous Barium Nickel Phosphate Nanofibers for Electrochemical Energy Storage

Teng Wang,<sup>a</sup> Qingli Hao,<sup>b</sup> Jinzhang Liu,<sup>c</sup> Jiachang Zhao,<sup>d</sup> John Bell,<sup>a</sup> Hongxia Wang,<sup>a\*</sup>

- a. School of Chemistry, Physics and Mechanical Engineering, Science and Engineering Faculty, Queensland University of Technology, Brisbane, QLD 4001, Australia. E-mail: hx.wang@qut.edu.au*
- b. Key Laboratory for Soft Chemistry and Functional Materials, School of Chemical Engineering, Nanjing University of Science and Technology, Nanjing, China*
- c. School of Materials Science and Engineering, Beihang University, Beijing, China.*
- d. College of Chemistry and Chemical Engineering, Shanghai University of Engineering Science, Shanghai, China.*

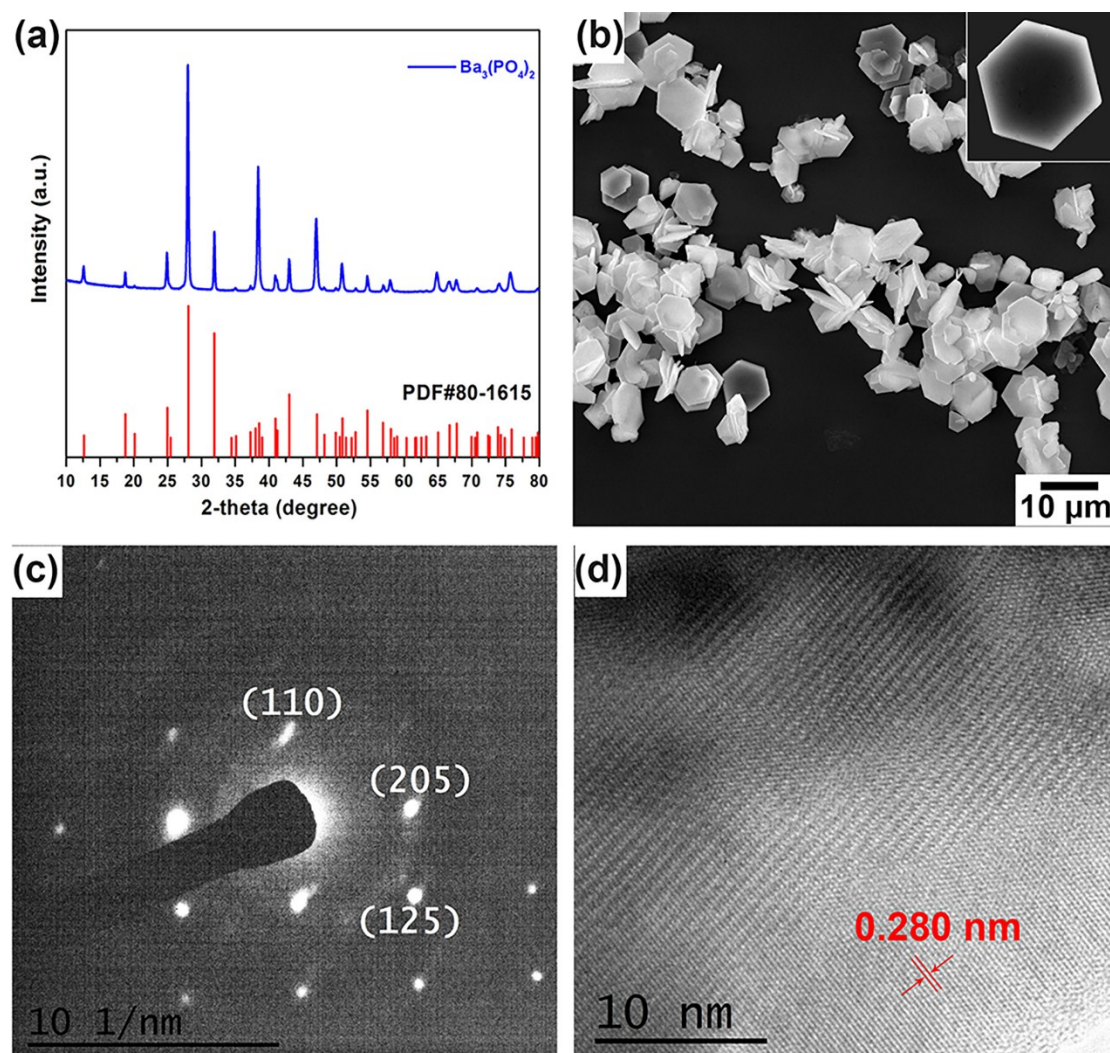

**Fig. S1.** (a) SEM image, (b) XRD pattern, (c) SAED pattern, and HRTEM image (d) of hexagonal  $\text{Ba}_3(\text{PO}_4)_2$  flakes, respectively

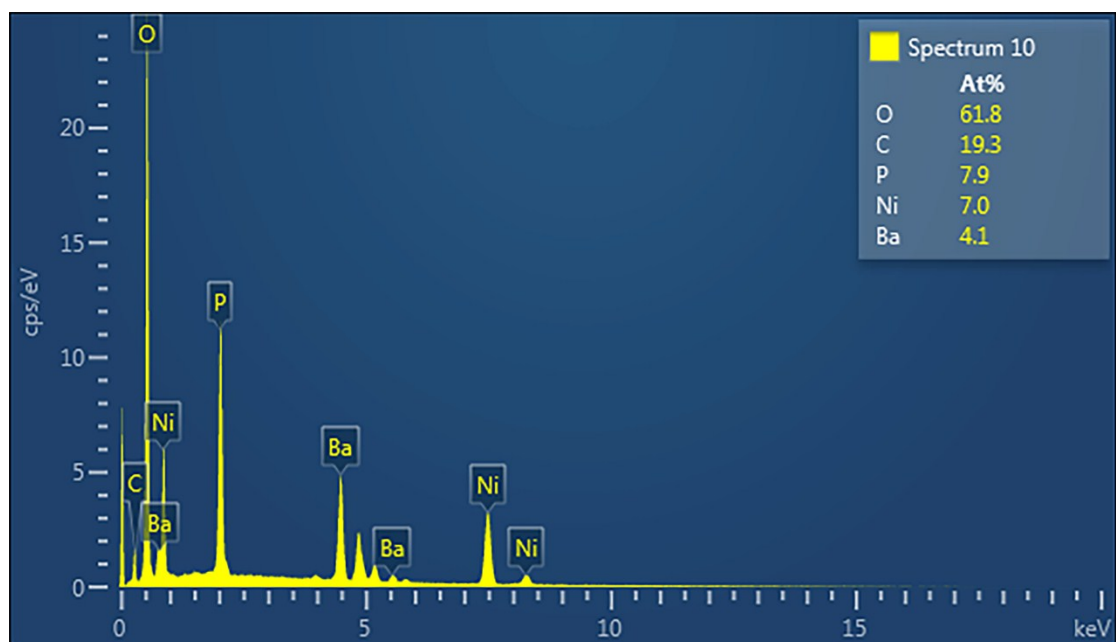

**Fig. S2.** EDS curve of fresh  $\text{Ba}_x\text{Ni}_{3-x}(\text{PO}_4)_2$  nanofibers

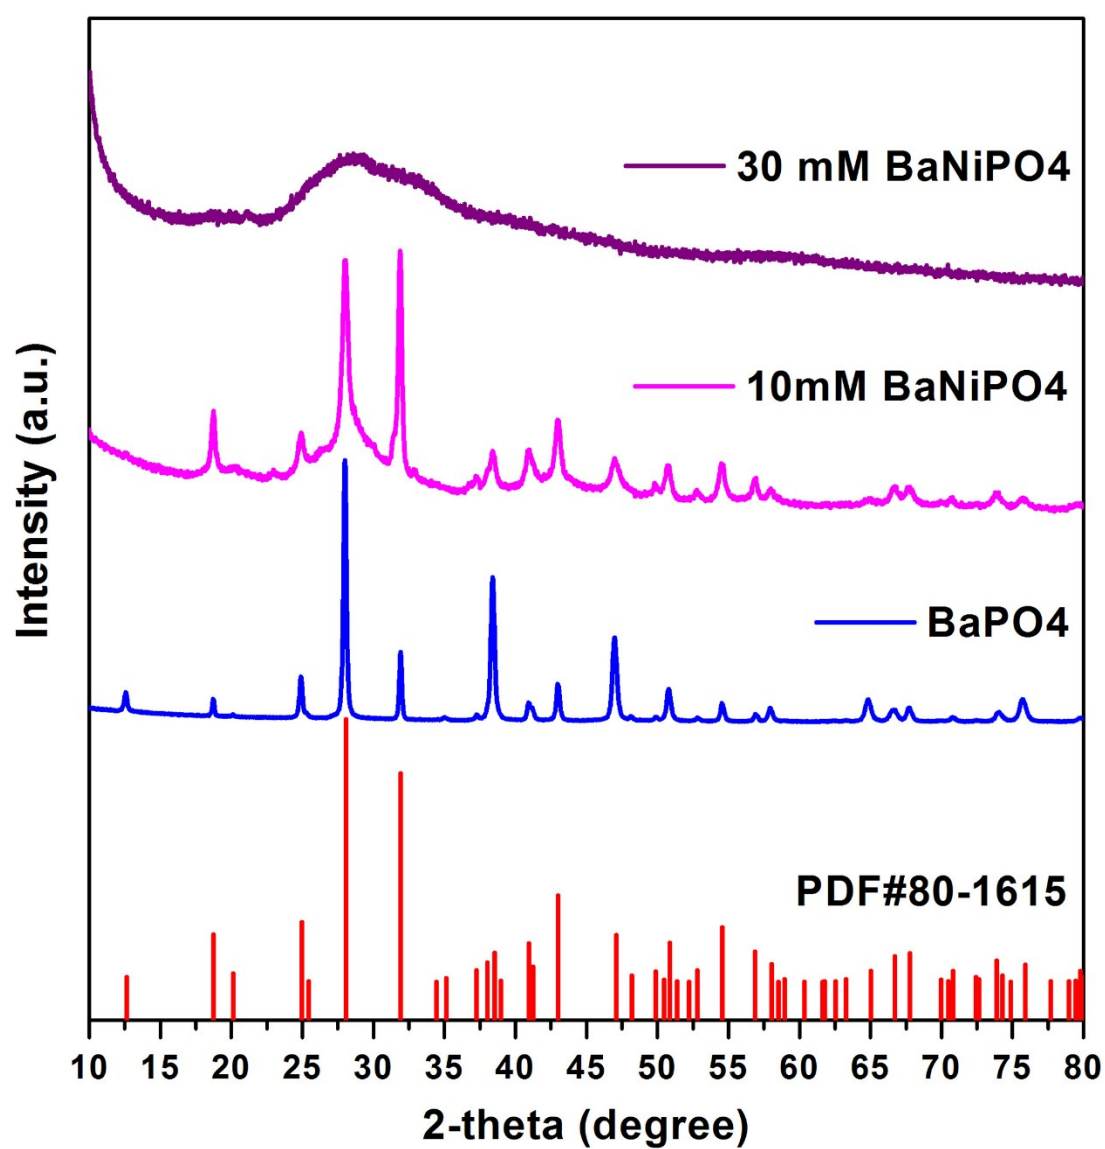

**Fig. S3.** XRD patterns of  $\text{Ba}_x\text{Ni}_{3-x}(\text{PO}_4)_2$  materials with different concentration of nickel nitrate precursor involved in the reaction.

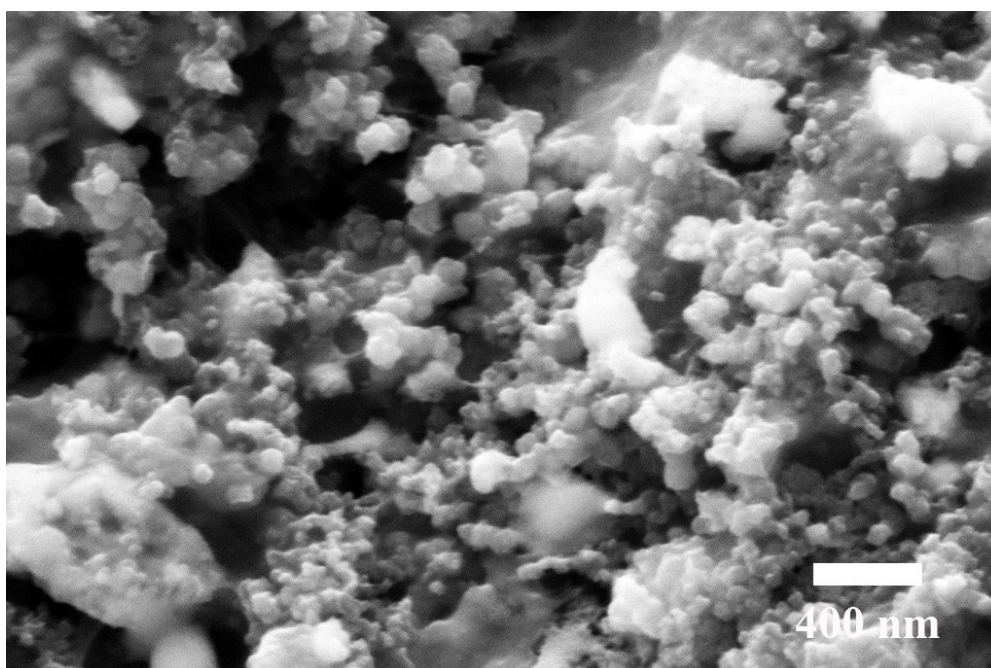

**Fig. S4.** SEM image of  $\text{Ba}_x\text{Ni}_{3-x}(\text{PO}_4)_2$  material after 500 charge/discharge cycles.

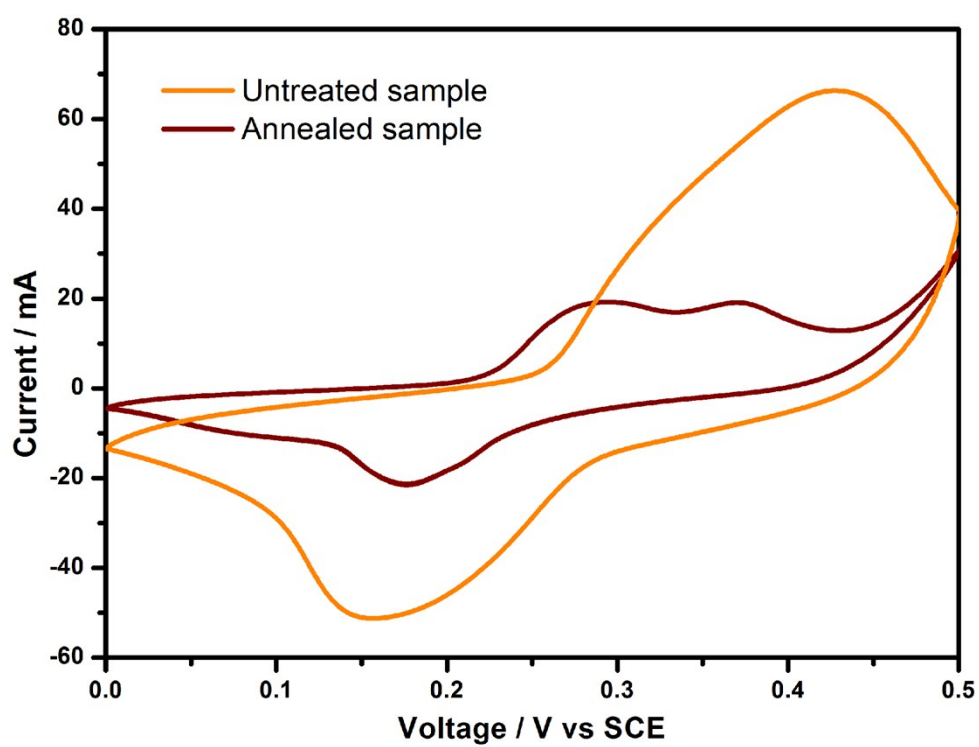

**Fig. S5.** CV curves of untreated and 800 Celsius annealed  $\text{Ba}_x\text{Ni}_{3-x}(\text{PO}_4)_2$  nanofibers with the sweeping rate at  $20 \text{ mV s}^{-1}$
